# Supplementary material for: A solar-responsive zinc oxide photoanode for solar-photon-harvester photoelectrochemical (PEC) cells
Source: Royal Society of Chemistry journal article supplement (doi:10.1039/d0na00139b), 2020-01-01
Supplement: d0na00139b1.pdf [file d0na00139b1.pdf]

## *Supporting Information*

# **Solar-responsive zinc oxide photo anode for solar- photon-harvester PEC Cell**

Rekha Dom, <sup>a,§</sup> G. Sivakumar, <sup>a</sup> Shrikant V. Joshi, <sup>b</sup> and Pramod H. Borse<sup>a†</sup>

<sup>a</sup>*International Advanced Research Centre for Powder Metallurgy and New Materials*

*Balapur PO, Hyderabad, Telangana, 500 005, India*

<sup>b</sup>*Department of Engineering Science, University West,*

*Gustava Melins Gata 2 46186 Trollhattan. SWEDEN.*

<sup>§</sup>*Authors present affiliation: M.V.S.R. Engineering college,*

*Nadergul, Hyderabad- 501510, India*

## 1.1 SPPS deposition methodology and related parameter optimization

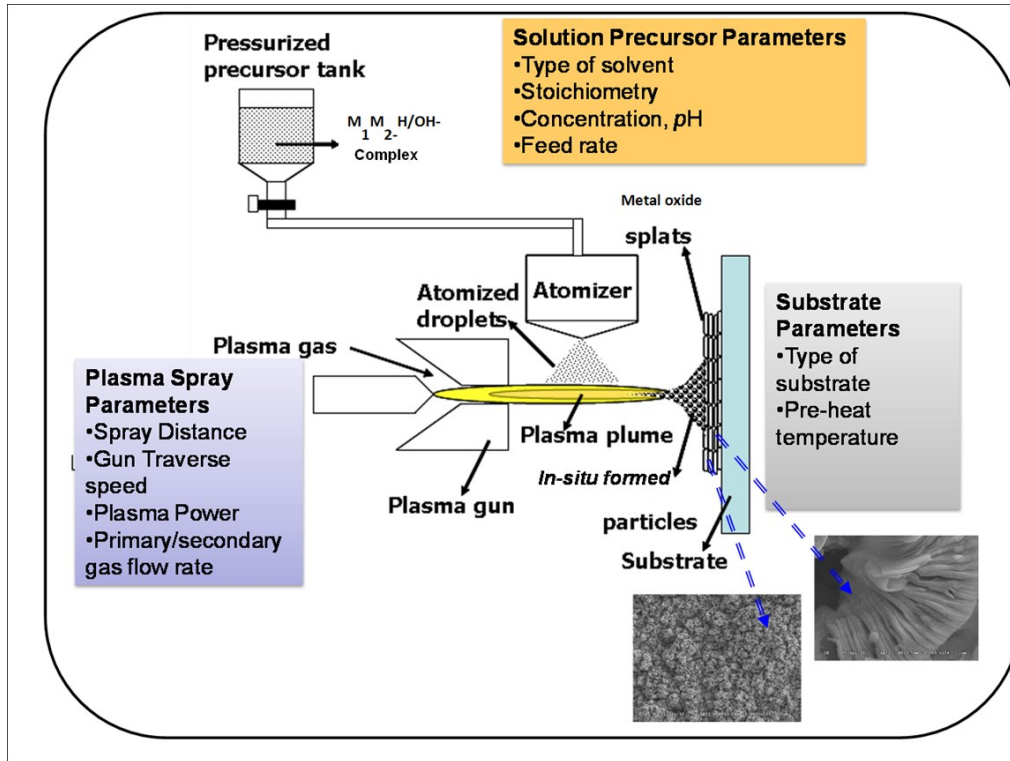

**Figure S1.** Schematic of the solution precursor plasma spray (SPPS) deposition methodology used for ZnO (SRZO) film deposition

## 1.2 Morphological studies of various ZnO films

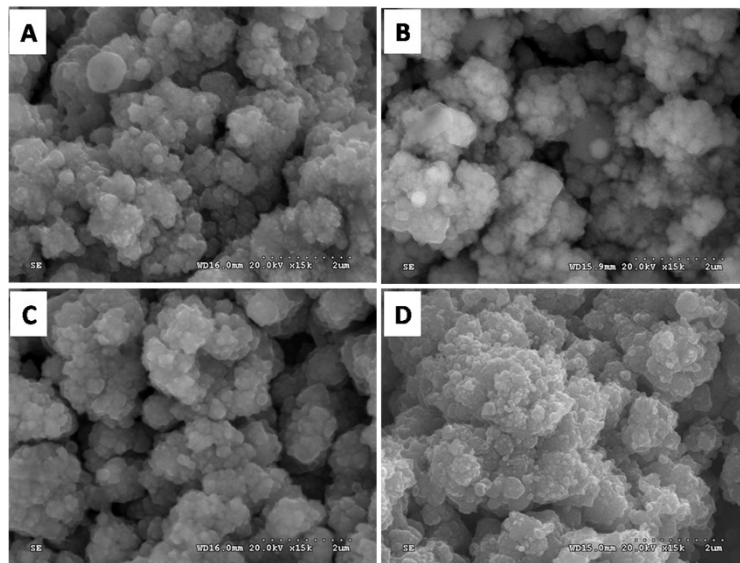

**Figure S2.** Surface morphology of the ZnO films of different thickness

### 1.3 Optical absorption studies of various ZnO films

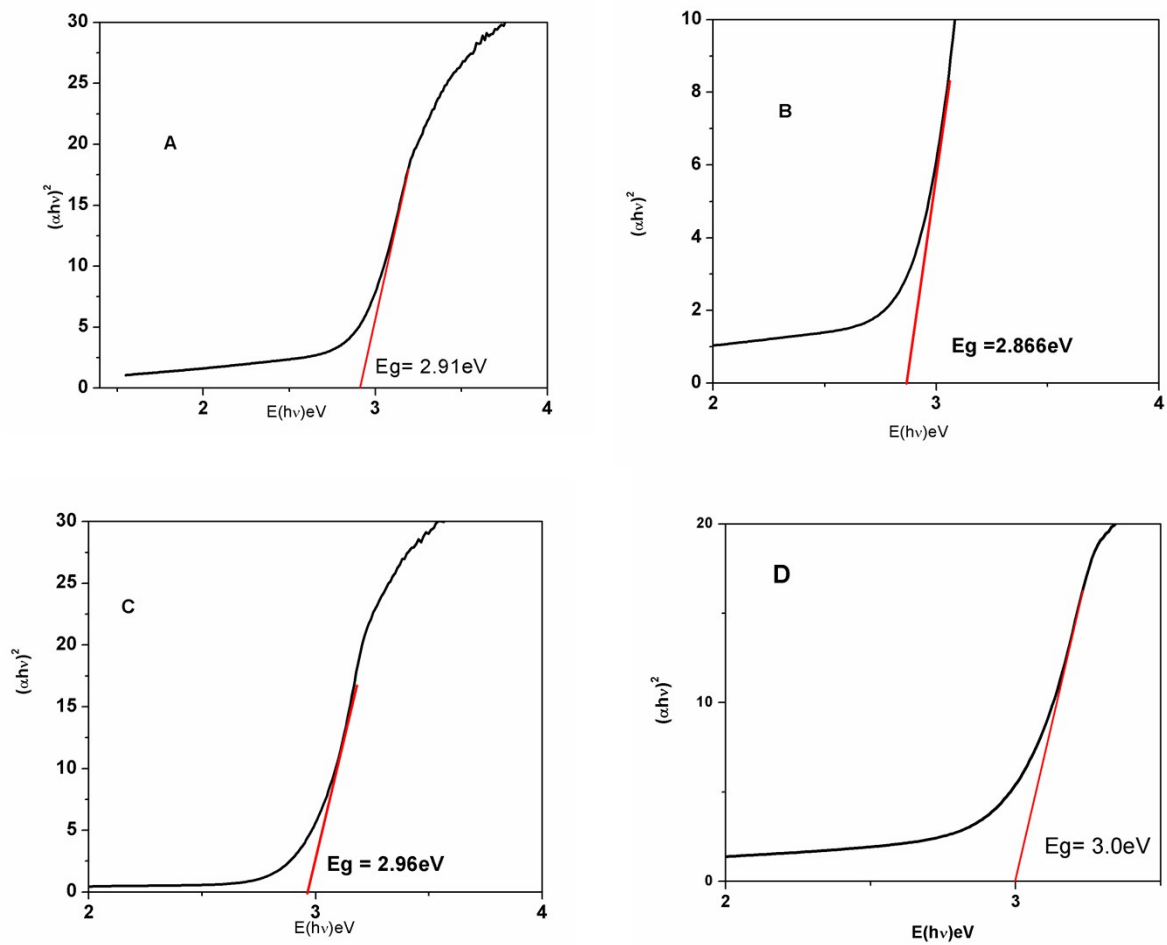

**Figure S3.** Tauc plots of the individual ZnO films of different thickness obtained from DRS absorption spectra

### 1.4 Photo Electrochemical characterization

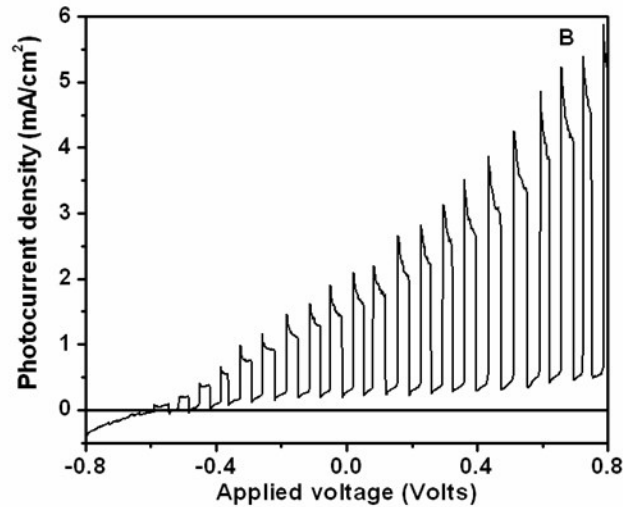

**Figure S4.** Chronopotential curves for ZnO film B under Hg arc lamp under light ON/OFF conditions at 0.6V biasing

### 1.5 Incident photon to current conversion efficiency (IPCE)

IPCE is one of the most important characterizations for PEC devices. It describes the photocurrent collected per incident photon flux as a function of illumination wavelength. IPCE was calculated for different electrodes using following equation (3):

$$IPCE = \frac{1240 * J_{ph}}{P * \lambda} \dots\dots\dots (3)$$

Where  $J_{ph}$  the photocurrent density in mAcm<sup>-2</sup>, P is power of source in mWcm<sup>-2</sup> and  $\lambda$  is wavelength in nm.

## 1.6 Electrochemical impedance spectroscopy (EIS) studies on the ZnO films

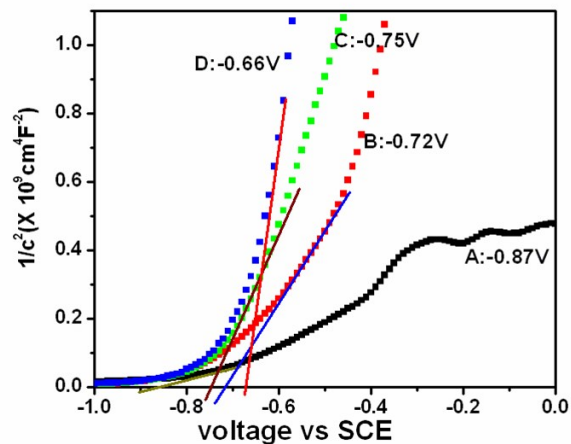

**Figure S5.** M-S plots of ZnO films of different thickness under dark conditions at zero bias and an ac applied voltage of 10mv and frequency 10kz.

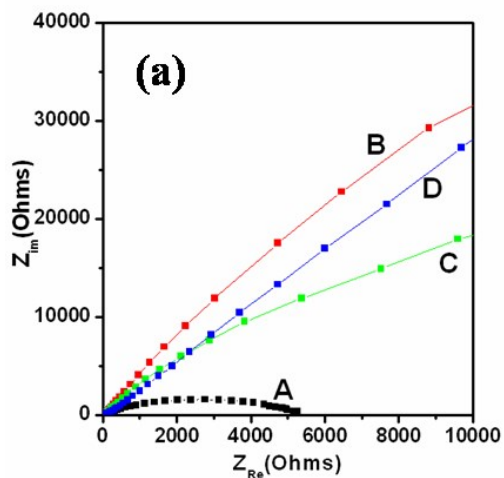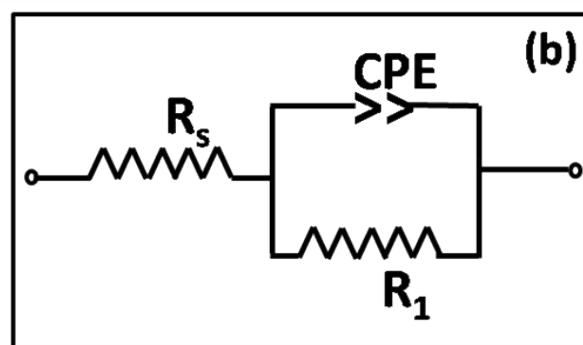

**Figure S6.**(a) EIS spectra of ZnO films of different thickness (b) Equivalent Randell circuit fitted using Zview software

**Table S1.** Electrochemical parameters obtained from Randell circuit using Zview software

| Electrode | $R_s(\Omega)$ | $R_1(\Omega)$          | CPE 1-T   | CPE 1-P |
|-----------|---------------|------------------------|-----------|---------|
| A         | 4.9           | 5762                   | 0.0001114 | 0.611   |
| B         | 11.47         | 174910                 | 0.0001354 | 0.789   |
| C         | 29.32         | 7345000                | 0.000209  | 0.771   |
| D         | 29.7          | $7.287 \times 10^{12}$ | 0.000057  | 0.710   |
